# Supplementary material
Source: PubMed Central journal article supplement (PMC4165441)
Supplement: bi500244m_si_001.pdf [file bi500244m_si_001.pdf]

## SUPPORTING INFORMATION

Jun Lu<sup>†</sup>, Ruiying Wu<sup>‡</sup>, Joshua N. Adkins<sup>§</sup>, Andrzej Joachimiak<sup>‡</sup>, and J. N. Mark Glover<sup>†\*</sup>

### SUPPLEMENTARY EXPERIMENTAL PROCEDURES

#### **GC/MS-EI (Gas chromatography/mass spectrometry-electron ionization) analysis.**

Organic solvent tetrachloroethylene was used to extract hydrophobic ligands from 2 mg of purified TraJ<sub>F</sub><sup>11-130</sup> and same volume of its buffer control. After concentration, the sample was injected for GC-MS-EI analysis at the Mass Spectrometry Facility, Department of Biochemistry, University of Alberta. Results are searched against NIST/EPA/NIH Mass Spectral Library for the ligand identity.

**Purification of TraJ<sub>F</sub><sup>11-130</sup> for GCMS-EI analysis of potential TraJ<sub>F</sub> ligands.** To identify the physiological ligand potentially present in the hydrophobic pocket at the dimeric interface of the F plasmid TraJ, His-tagged TraJ<sub>F</sub><sup>11-130</sup> was purified from 5 liters of cells containing pJLJ5629 without IPTG induction such that the protein is expressed at low levels to allow high occupancy of the potential physiological ligand. The protein was further purified similarly as described in Experimental Procedures except that no DTT was present throughout the purification.

**Limited proteolysis of His<sub>6</sub>-TraJ<sub>F</sub><sup>11-130</sup>.** Four aliquots of 10 μg of His<sub>6</sub>-TraJ<sub>F</sub><sup>11-130</sup> purified from *E. coli* BE280 (TnaA<sup>-</sup>) cells in the absence of reducing agents were diluted in buffer (50 mM Tris-HCl, 300 mM NaCl, pH 7.5) to a final concentration of 1 μg/μL. Two of the aliquots also contain a certain additive at the following final concentrations: DTT at 3 mM or indole at 3 mM. After incubation at 25°C for a week, 3 aliquots were mixed with 0.2 μg of

trypsin and was further incubated at 25°C for 2 hours and then mixed with 1 µL of PMSF (10 mg/mL). One aliquot without additives was used as undigested control. Samples were separated by SDS-PAGE. The molecular weight of the tryptic fragments were determined by matrix-assisted laser desorption/ionisation time-of-flight (MALDI-TOF) mass spectrometry. Mass spectrometry was performed at Institute of Biomolecular Design, University of Alberta.

***In vitro* cross-linking assays.** Four aliquots of 10 µg of His<sub>6</sub>-TraJ<sub>F</sub><sup>11-130</sup> purified from *E. coli* BE280 (TnaA<sup>-</sup>) cells in the absence of reducing agents were diluted in buffer (50 mM sodium phosphate, 300 mM NaCl, pH 7.5) to a final concentration of 1 µg/µL. Two aliquot also contains a certain additive at the following final concentrations: DTT at 3 mM or indole at 3 mM. After incubation at 25°C for a week, 3 aliquot were mixed with BS<sup>3</sup> (Bis[sulfosuccinimidyl] suberate) (Pierce) to a final concentrations of 300 µM. One aliquot without additives was used as the negative control. After 30 minutes of incubation at 25°C, 1 µL of 1M Tris-HCL (pH 7.5) was added to each aliquot, followed by another 5 minutes of incubation at room temperature. Proteins were separated by SDS-PAGE and visualized by Coomassie blue staining.

## SUPPLEMENTARY RESULTS

**Characterizing potential ligands at the dimeric interface of TraJ<sub>F</sub>.** In the electron density map of both SeMet-TraJ<sub>F</sub><sup>1-140</sup> and TraJ<sub>F</sub><sup>11-130</sup>, there is a strong density unaccounted for in an internal pocket formed at the dimeric interface. The higher resolution data from the TraJ<sub>F</sub><sup>11-130</sup> crystals revealed electron density suggesting a six-member ring structure with substituents at two adjacent positions in the ring (Figure S2). Calculation of an anomalous difference map from the same native data set revealed two strong adjacent anomalous difference peaks in the ring. GC-MS-EI analysis of a purified TraJ<sub>F</sub><sup>11-130</sup> sample indicated the presence of DTD (Dithiane diol, oxidized DTT) in the protein solution. DTD indeed fits the density, with the two sulphur atoms positioned on the anomalous difference peaks.

The presence of DTD within the pocket at the TraJ<sub>F</sub> dimer interface suggested that a similar small molecule ligand might bind this pocket to modulate dimerization, providing a potential mechanism for the regulation of TraJ activity and conjugation in response to a small molecule signal. We reasoned that the native ligand might have been lost and exchanged for DTD during purification. In addition, overexpression of TraJ<sub>F</sub><sup>11-130</sup> might have exceeded the amounts of native ligand available in the cells. Therefore, to isolate the TraJ<sub>F</sub> PAS domain with any bound natural ligands, we purified TraJ<sub>F</sub><sup>11-130</sup> from cells expressing the protein at close to physiological levels (to allow higher occupancy of potential physiological ligand) and in the absence of DTT (see Supplementary Experimental Procedures). GC/MS-EI analysis of this sample revealed the presence of a small molecule most likely to be indole based on its fragmentation pattern (Figure S3). In *E. coli*, indole is derived from tryptophan catalysed by tryptophanase (TnaA) and serves as a common intercellular signal<sup>1, 2</sup>. To test a role for indole in TraJ<sub>F</sub> function *in vivo*, we compared levels of TraJ-dependent F plasmid P<sub>Y</sub> activity in wild type

or *tnaA* *E. coli* strains (Figure S4A). TraJ<sub>F</sub> activated P<sub>Y</sub> to comparable levels in both the wild type (TnaA<sup>+</sup>) and in two distinct TnaA<sup>-</sup> strains, indicating that indole is dispensable for the *in vivo* function of TraJ<sub>F</sub>. To identify other potential ligands, we further purified TraJ<sub>F</sub><sup>11-130</sup> from a non-indole-producing strain in the absence of DTT and analysed the purified protein with GC-MS-EI. No ligands were identified in the analysis of three independent preparations of the protein.

TraJ<sub>F</sub><sup>11-130</sup> purified in the absence of DTT and indole elutes at the same volume by size exclusion chromatography as protein purified with DTT and indole, suggesting that indole and DTT might not affect TraJ<sub>F</sub><sup>11-130</sup> dimerization. We further used biochemical assays to test for the potential effects of small molecule ligands of TraJ<sub>F</sub> PAS dimer stability. We assayed the *in vitro* structural stability of TraJ<sub>F</sub><sup>11-130</sup> with and without DTD or indole through limited trypsin analysis and chemical crosslinking (Figure S4B and S4C). Aliquots of TraJ<sub>F</sub><sup>11-130</sup> purified in the absence of DTT and indole were mixed with DTT or indole, and after equilibration at room temperature, were subjected to trypsin digestion or BS<sup>3</sup> chemical crosslinking as described in Experimental Procedures. TraJ<sub>F</sub><sup>11-130</sup> with and without DTT (or indole) have similar patterns of limited trypsin digestion (Figure S4B), resulting in a predominant major tryptic fragment, TraJ<sub>F</sub><sup>38-130</sup>, agreeing with our previous analysis<sup>3</sup>. BS<sup>3</sup> chemical crosslinking also showed that neither indole nor DTT appreciably affected TraJ<sub>F</sub><sup>11-130</sup> dimerization efficiency (Figure S4C). Therefore, DTT and indole do not appear to be required for proper folding and dimerization of TraJ<sub>F</sub><sup>11-130</sup> in solution.

## SUPPLEMENTARY REFERENCES

- [1] Burns, R. O., and Demoss, R. D. (1962) Properties of tryptophanase from *Escherichia coli*, *Biochim Biophys Acta* 65, 233-244.
- [2] Lee, J. H., and Lee, J. (2010) Indole as an intercellular signal in microbial communities, *FEMS Microbiol Rev* 34, 426-444.
- [3] Lu, J., Peng, Y., Arutyunov, D., Frost, L. S., and Glover, J. N. (2012) Error-prone PCR mutagenesis reveals functional domains of a bacterial transcriptional activator, TraJ, *J Bacteriol* 194, 3670-3677.
- [4] Jobling, M. G., and Holmes, R. K. (1990) Construction of vectors with the p15a replicon, kanamycin resistance, inducible lacZ alpha and pUC18 or pUC19 multiple cloning sites, *Nucleic Acids Res* 18, 5315-5316.
- [5] Stols, L., Gu, M., Dieckman, L., Raffin, R., Collart, F. R., and Donnelly, M. I. (2002) A new vector for high-throughput, ligation-independent cloning encoding a tobacco etch virus protease cleavage site, *Protein Expr Purif* 25, 8-15.
- [6] Tabor, S., and Richardson, C. C. (1985) A bacteriophage T7 RNA polymerase/promoter system for controlled exclusive expression of specific genes, *Proc Natl Acad Sci U S A* 82, 1074-1078.
- [7] Sugino, Y., and Hirota, Y. (1962) Conjugal fertility associated with resistance factor R in *Escherichia coli*, *J Bacteriol* 84, 902-910.

**Table S1.** Plasmids and oligonucleotides

| Plasmid and oligonucleotide | Description and references                                                                                                                                                                                                     |
|-----------------------------|--------------------------------------------------------------------------------------------------------------------------------------------------------------------------------------------------------------------------------|
| pIZ2023                     | pSLT <i>traJ</i> cloned in pGEM-T easy vector; a gift from Prof. Josep Casadesus, Universidad de Sevilla                                                                                                                       |
| pJLac101-P <sub>Y</sub>     | P <sub>Y</sub> - <i>lacZ</i> fusion cloned in pJLac101 <sup>3</sup>                                                                                                                                                            |
| pJLJ001                     | The F plasmid <i>traJ</i> cloned in pK184 <sup>3</sup>                                                                                                                                                                         |
| pJLJ002                     | F-like plasmid pSLT <i>traJ</i> cloned in pK184; this work                                                                                                                                                                     |
| pJLJ003                     | F-like plasmid R100 <i>traJ</i> cloned in pK184; this work                                                                                                                                                                     |
| pJLJ004                     | A pSLT-F plasmid hybrid <i>traJ</i> (TraJ <sub>pSLT</sub> <sup>1-125</sup> :TraJ <sub>F</sub> <sup>121-226</sup> ) cloned in pK184; this work                                                                                  |
| pJLJ005                     | An R100-F plasmid hybrid <i>traJ</i> (TraJ <sub>R100</sub> <sup>1-120</sup> :TraJ <sub>F</sub> <sup>121-226</sup> ) cloned pK184; this work                                                                                    |
| pJLJ2123                    | F plasmid <i>traJ</i> <sup>1-140</sup> cloned in pT7-7; this work                                                                                                                                                              |
| pJLJ2829                    | F plasmid <i>traJ</i> <sup>11-130</sup> cloned in pT7-7; this work                                                                                                                                                             |
| pJLJ5629                    | F plasmid <i>traJ</i> <sup>11-130</sup> cloned in pK184 such that the TraJ <sup>11-130</sup> is constitutively expressed at close to physiological levels of TraJ <sub>F</sub> <sup>3</sup> ; this work                        |
| pK184                       | P15a replicon-base cloning vector, Km <sup>R</sup> <sup>4</sup>                                                                                                                                                                |
| pMCSG7                      | Bacterial expression ligation independent cloning vector with T7 promoter (pET21 derivative), adds N-terminal His tag and TEV protease site; Amp <sup>R</sup> ; ColE1 pBR322-type bacterial origin of replication <sup>5</sup> |
| pT7-7                       | Protein expression vector; pMB1 replicon; Amp <sup>R</sup> <sup>6</sup>                                                                                                                                                        |
| pJSLT128                    | TraJ <sub>pSLT</sub> <sup>1-128</sup> cloned in pMCSG7; this work                                                                                                                                                              |
| R100                        | An F-like conjugative plasmid <sup>7</sup>                                                                                                                                                                                     |
| JLU308                      | TAT GGA TCC CTT CTG GTT ACC ACT TAT GTT TGC AG                                                                                                                                                                                 |
| JLU321                      | TAGAATTCACCATCACCATCACCATGAGAACCTGTACTTCCAAGGAT<br>ATCCGATGGATCGTATTCAACAAAAACATG                                                                                                                                              |
| JLU323                      | ATG GAT CCC TAT TAT CTG ATA TCA TCA CTG ACA ATC G                                                                                                                                                                              |
| JLU328                      | TAGAATTCACCATCACCATCACCATGAGAACCTGTACTTCCAAGGAC<br>AAATAGATCTGCTGGAAAATCTGACGG                                                                                                                                                 |
| JLU329                      | ATGGATCCTATTAATTATAACTGTCTTTATGACGAACATGAGCAGC                                                                                                                                                                                 |
| JLU330B                     | ATGAATTCGAGGAGGTTTCTATGTATCCGACAGATCCTAGACAACTT<br>AATACTGAACGTC                                                                                                                                                               |
| JLU331B                     | TTTGGATCCTTTATTGCCCCGAGCAGGCC                                                                                                                                                                                                  |

---

|        |                                                                                  |
|--------|----------------------------------------------------------------------------------|
| JLU346 | GCTGCTCATGTTTCGTCATAAAGACAG                                                      |
| JLU347 | CTGTCTTTATGACGAACATGAGCAGCGCAGAAAAAAGCCATAAAA<br>CATTAAACCACCTC                  |
| JLU349 | ATAGAATTCGTGAGGAGGTTTCCTATGCAAATAGATCTGGCGGAAAA<br>TCTGACGGCAGTTATTCAGG          |
| JLU350 | CGCTGACTGGACAGATATTGTCCAGAATCTATTCTG                                             |
| JLU351 | CAGAATAGATTCTGGACAATATCTGTCCAGTCAGCGCTTAATGGACA<br>CAGAAATATTATTCTGTGG           |
| JLU352 | CGCCACAGAATAATATTTCTGTGTCCATTAAGAAATGAC                                          |
| JLU353 | GTCATTTCTTAATGGACACAGAAATATTATTCTGTGGGCGTTTTATGA<br>TGCTGCTCATGTTTCGTCATAAAGACAG |
| JLU356 | ATAGAATTCGTGAGGAGGTTTCCTATGCACCATCACCATCACCATCAA<br>ATAGATCTGCTGGAAAATCTGACGGC   |
| JLU390 | ATAGAATTCCTTTGAGGAGGTTTCCTATGTGTCCGACGGATCGTAGAG                                 |
| JLU391 | CTGTCTTTATGACGAACATGAGCAGCTAAATTTATCTGCCACAACAC<br>AATTATCTCATTATTATCGAATG       |
| JLU394 | TATGGATCCTCACTTAACACAATAAAATTCACGAATAATGTCTATCA<br>ATG                           |
| TraJA  | TACTTCCAATCCAATGCCATGTGTCCGACGGATCGTAGAGAAA                                      |
| TraJB  | TTATCCACTTCCAATGTTAATGATCTGGAAATAAATTTATCTGCCACA<br>ACACA                        |

---





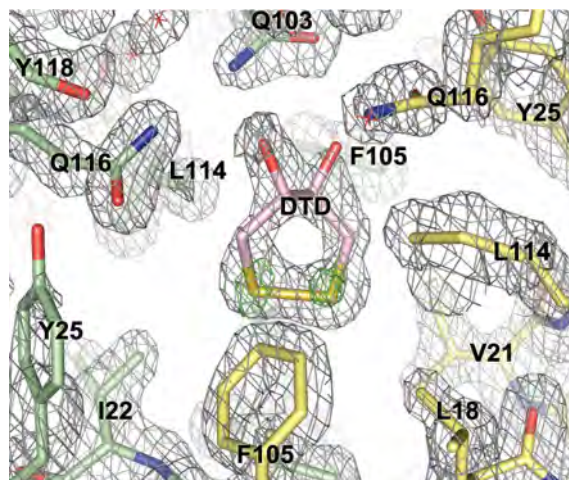

**Figure S2.** Electron density maps for the region surrounding the DTD molecule at the dimerization interface. In grey is the  $2F_O-F_C$  electron density map, calculated to  $1.55 \text{ \AA}$  resolution and contoured at  $1.5 \sigma$ , and in green is an anomalous difference electron density map, calculated to  $1.55 \text{ \AA}$  resolution and contoured at  $3.0 \sigma$ . The two protomers are colored in green and yellow, respectively, with the DTD in magenta with the sulphur atoms coloured yellow. Water molecules are shown in red “+”.

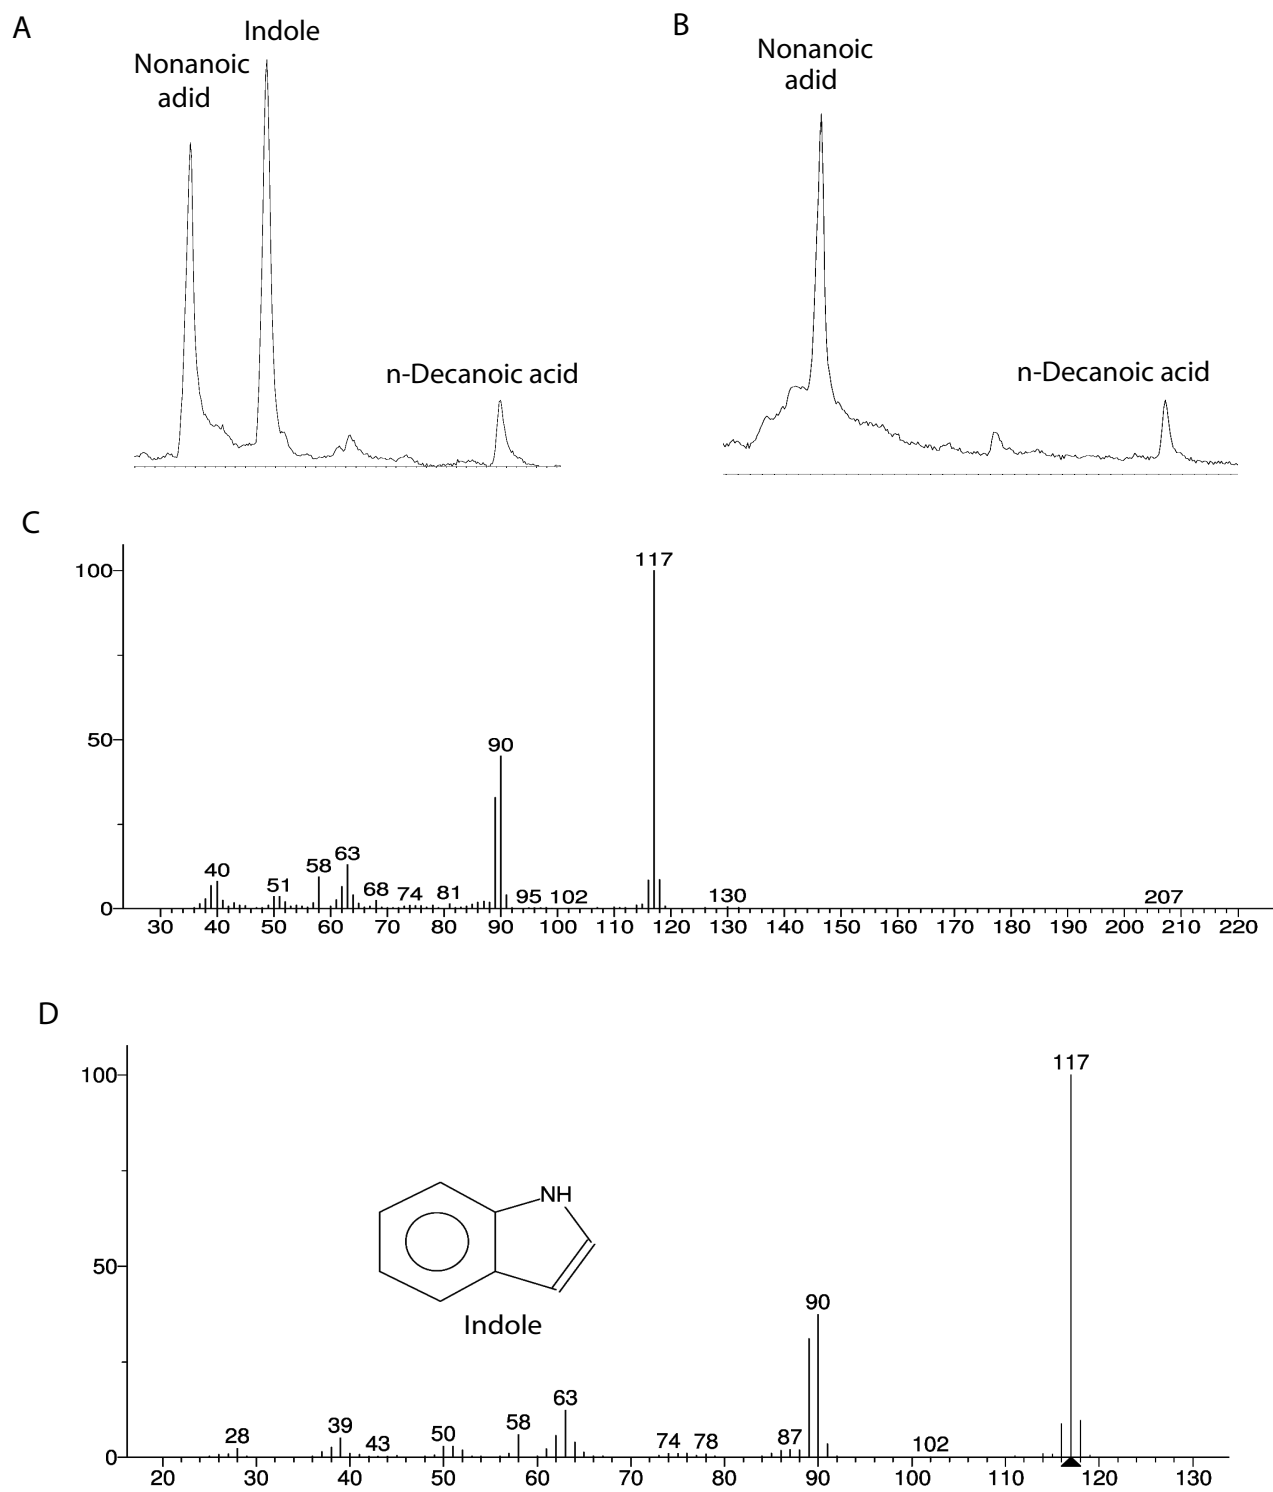

**Figure S3.** Presence of indole in TraJ<sub>F</sub><sup>11-130</sup> purified in absence of DTT. (A) Total ion current chromatogram of the extract from the TraJ<sub>F</sub><sup>11-130</sup> sample. (B) Total ion current chromatogram of the extract from the buffer control. (C) Experimental mass spectrum of indole in the extract from the TraJ<sub>F</sub><sup>11-130</sup> sample. (D) Standard mass spectrum<sup>11</sup> of indole in the NIST08 library.

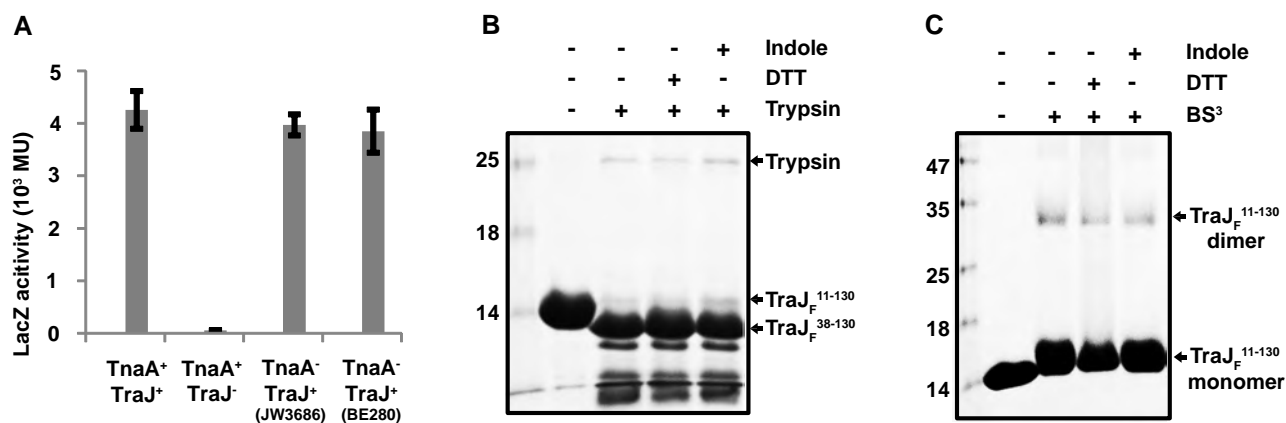

**Figure S4.** Potential TraJ<sub>F</sub> small molecule ligands do not modulate the stability of the PAS dimer or the activity of TraJ<sub>F</sub> *in vivo*. (A) Tryptophanase (TnaA) does not regulate TraJ<sub>F</sub> activity in *E. coli*. TraJ<sub>F</sub> activity was measured by a transcriptional reporter gene assay using pJLAC101-P<sub>Y</sub> that harbours an F plasmid P<sub>Y</sub>-lacZ fusion gene. LacZ activity was assayed in an *E. coli* TnaA<sup>+</sup> (BW25113; indole-producing) strain or two different TnaA<sup>-</sup> strains (JW3686 and BE280, non-indole-producing). TraJ<sub>F</sub> was expressed *in trans* from pJLJ001. A pJLJ001 derivative with a frameshifted *traJ* was used as the TraJ<sup>-</sup> control. (B) Effect of indole or DTT on limited trypsin digestion of TraJ<sub>F</sub><sup>11-130</sup>. Numbers on the left side of the figure indicate molecular weight markers (in kDa) (first lane). (C) Effect of indole or DTT on *in vitro* BS3 chemical cross-linking of TraJ<sub>F</sub><sup>11-130</sup>.
